# Supplementary material
Source: HighWire-hosted journal article supplement (https://bmjopen.bmj.com/content/7/9/e015379)
Supplement: inline-supplementary-material-1 [file inline-supplementary-material-1.pdf]

## Appendix 1 Questionnaire: Attitudes to and behaviour concerning clinical guidelines in primary care of China

To whom it may concern,

Thank you for taking time to participate in this survey. Our objective is to investigate the health practitioners' behavior and needs concerning clinical guidelines in primary care institutions. We conduct an anonymous survey and promise that your private information will not be disclosed. Thanks for your collaboration.

1. Your working place: \_\_\_\_\_ Province/Autonomous Region /Municipality

2. Name of the health care institution you are working in:  
\_\_\_\_\_

3. Type of institution you are working in:

- A. County Hospital
- B. Community Health Service Centers
- C. Township Hospital
- D. Village Clinics
- E. Clinics
- F. Others \_\_\_\_\_

4. Your specialty

- A. Physicians
- B. Nurses
- C. Pharmacists
- D. Administrators
- E. Others \_\_\_\_\_

5. Your gender

- A. Male
- B. Female

6. Your education background

- A. Junior college and lower
- B. Undergraduate
- C. Master
- D. Doctor and higher
- E. Others \_\_\_\_\_

7. Your title

- A. Junior
- B. Middle

- C. Senior
- D. N/A
- E. Others \_\_\_\_\_

**8. Do you know what the clinical guideline is?**

- A. Unaware
- B. Partially knowledgeable
- C. Completely knowledgeable

(If you unaware of clinical guidelines, you could quit this survey)

**9. Frequency of clinical guidelines use**

- A. Frequently
- B. Often
- C. Occasionally
- D. Never

(If you never use guidelines, you can ignore No.10-14)

**10. Do you think it is necessary for primary healthcare practitioners to use clinical guidelines?**

- A. Necessary
- B. Not necessary
- C. It does not matter

**11. Degree of current clinical guidelines fit for primary care institutions:**

- A. Entirely appropriate
- B. Partially appropriate
- C. Not appropriate
- D. Unaware

**12. Most of clinical guidelines you use derived from(Could be multiple choice):**

- A. Public search engines (eg. Baidu, Google)
- B. Medical websites (eg. DXY.cn, Clinphar.cn)
- C. Chinese biomedical databases (eg. WanFang, VIP, CNKI)
- D. Foreign biomedical databases (eg. Medline, Pubmed, Cochrane)
- E. Professional medical journals as subscribed
- F. Guidelines distributed by pharmaceutical companies
- G. Guidelines distributed by institutions
- H. Unaware of how to find a guideline
- I. Others \_\_\_\_\_

**13. Which part of guidelines do you frequently read? (Could be multiple choice)**

- A. Abstract
- B. Summary of recommendations
- C. Background
- D. Method

- E. Flow chart of diagnose and treatment
- F. Recommendations
- G. Evidence level and recommendation strength
- H. Evidence for recommendations
- I. References
- J. Full text
- K. Others \_\_\_\_\_

**14. Which type of guidelines do you use frequently?** (Could be multiple choice)

- A. Chinese guidelines for primary care institutions
- B. Chinese guidelines for all medical institutions
- C. Original foreign guidelines
- D. Translated foreign guidelines
- E. Others \_\_\_\_\_

**15. The obstacles for primary care practitioners to use guidelines** (Could be multiple choice)

- A. Lack concise forms of guidelines
- B. Lack regular access to guidelines
- C. Lack aware of using guidelines
- D. Current guideline do not satisfy needs of primary care
- E. Poor updates of guidelines
- F. Limited knowledge of primary care practitioners
- G. Language barrier
- H. No time to read guidelines
- I. Lack training on guidelines
- J. Lack supervision on whether practices complying with guideline
- K. Others \_\_\_\_\_

**16. Do you think it is necessary to develop clinical guidelines for primary care institutions?**

- A. Necessary
- B. Unnecessary
- C. Do not care

**Reason for your answer:**

---



---

(If you think it is unnecessary, you could stop the survey. )

**17. What type of guidelines do you think is more desirable for primary care institutions?**

- A. Specialized guideline
- B. General guideline

**18. Which parts do you think guidelines for primary care institutions should include?** (Could be multiple choice)

- A. Abstract
- B. Recommendations (abstract)
- C. Background
- D. Method
- E. Flow chart of diagnose and treatment
- F. Recommendations (main body)
- G. Evidence level and recommendation strength
- H. Evidence for the recommendations
- I. References
- J. Full text
- K. Others \_\_\_\_\_

**19. Your preferred guidelines**

**1) Length**

- A. Full text version
- B. Summary version (including the recommendations)
- C. Both can do
- D. Others \_\_\_\_\_

**2) Language**

- A. Chinese
- B. English
- C. Both can do
- D. Others \_\_\_\_\_

**3) Version**

- A. Hard copy
- B. Electronic edition
- C. Both can do
- D. Others \_\_\_\_\_

**20. Which ways do you like to have access to guidelines for primary care institutions? (Could be multiple choice)**

- A. Public search engines (eg. Baidu, Google)
- B. Medical websites (eg. DXY.cn, Clinphar.cn)
- C. Biomedical databases (eg. WanFang, VIP, CNKI, Medline)
- D. Professional medical journals
- E. Periodical training program for guidelines
- F. Periodical dispersion of hard copy or electronic edition of guidelines
- G. Others \_\_\_\_\_

**21. Do you want to attend training program for clinical guidelines for primary care institutions?**

- A. Yes
- B. No
- C. Do not care

**22. Your suggestions for development of clinical guidelines for primary care institutions:**

---

---

---

**Thank you again for your participation!**

---

**For surveyor only**

**1. Name:**

**2. Contact information:**

**3. Survey time:**

**4. Survey method:**

- A. Field survey
- B. Telephone survey
- C. Email survey
- D. Others \_\_\_\_\_

**5. If it was a field survey**

- A. Respondents completed the questionnaire independently
- B. Respondents completed the questionnaire with the assistance of the surveyor
- C. Surveyor completed the questionnaire after consulting the respondents
